# Supplementary material
Source: PubMed Central journal article supplement (PMC9320915)
Supplement: ehp10009.smcontents.508.pdf [file ehp10009.smcontents.508.pdf]

**Note to readers with disabilities:** *EHP* strives to ensure that all journal content is accessible to all readers. However, some figures and Supplemental Material published in *EHP* articles may not conform to [508 standards](#) due to the complexity of the information being presented. If you need assistance accessing journal content, please contact [ehp508@niehs.nih.gov](mailto:ehp508@niehs.nih.gov). Our staff will work with you to assess and meet your accessibility needs within 3 working days.

### **Supplemental Material**

#### **Internal Relative Potency Factors for the Risk Assessment of Mixtures of Per- and Polyfluoroalkyl Substances (PFAS) in Human Biomonitoring**

Wieneke Bil, Marco J. Zeilmaker, and Bas G.H. Bokkers

#### **Table of Contents**

##### **Toxicokinetic model parameterization**

**Table S1. Hepatotoxicity data for perfluoroalkyl substances (PFAS).** Male rat dose-response data for 16 PFAS including full chemical name, chemical name abbreviation, CAS no. and reference. Database as presented in Bil et al.

**Table S2. Specifications of the perfluoroalkyl substances (PFAS) measured in human blood serum in the National Health and Nutrition Examination Survey (NHANES).** Chemical names, abbreviations and CAS numbers of PFAS measured in NHANES cycle 2017-2018.

**Table S3. Organ/tissue to serum partition coefficients for perfluorododecanoic acid (PFDoDA) to calculate the volume of distribution ( $V_1$ ).** The organ/tissue and serum concentrations reported in Kawabata et al. were used to calculate organ/tissue to serum partition coefficients in order to estimate the volume of distribution ( $V_1$ ) for model parametrization.

**Table S4. Organ volume reference values to calculate the volume of distribution ( $V_1$ ) for perfluorododecanoic acid (PFDoDA).** Organ volume reference values for rats as proposed by Jongeneelen and ten Berge.

**Table S5. Internal relative potency factors (RPFs) and lower and upper bounds of the 90%-confidence intervals for perfluoroalkyl substances (PFAS) based on relative liver weight increase in the male rat.** The confidence intervals do not include the uncertainty resulting from the external-to-internal dosing extrapolation, but solely the uncertainty in the toxicity data.

**Figure S1. Overview of National Health and Nutrition Examination Survey (NHANES) results.** Note: serum concentrations of each perfluoroalkyl substance (PFAS) in the sampled NHANES study population ( $n = 1929$ ) in the 2017-2018 cycle above lower limit of detection (LOD, 0.100 ng/mL) plotted on a  $\log_{10}$ -scale ( $x$ -axis). Values below lower LOD are not plotted. On the right  $y$ -axis are the number of samples above LOD. 6:2 Cl-PFESA, 9-chlorohexadecafluoro-3-oxanonane-1-sulphonic acid; ADONA, ammonium salt of 4,8-dioxa-3H-perfluorononanoic acid; br., branched; HFPO-DA, hexafluoropropylene oxide-dimer acid; lin., linear; LOD, lower limit of detection; Me-FOSAA, 2-(N-methyl-perfluorooctane sulphonamido) acetic acid; PFDA, perfluorodecanoic acid; PFHpS, perfluoroheptane sulfonic acid; PFHxA, perfluorohexanoic acid; PFHxS, perfluorohexane sulfonic acid; PFNA, perfluorononanoic acid; PFOA, perfluorooctanoic acid; PFOS, perfluorooctane sulfonic acid; PFUnDA, perfluoroundecanoic acid.

**Figure S2. Simulation of a single dose experiment for PFNA with a two-compartment model fitted to measured serum concentrations for single oral exposure of male rats to 3 mg/kg PFNA.** Note: modelling was based on the parameter values in Tatum-Gibbs *et al.* and plotted together with the serum measurements reported in that study. The solid and dashed lines are the modelled concentrations in the first and second compartments respectively, the circles indicate the mean measured serum concentrations over time. Visually, this model does not seem to describe the data adequately; the data do not show biphasic elimination and the modelled elimination appears faster compared to the measured elimination.

**Figure S3. Simulation of a single dose experiment for PFNA with a one-compartment model fitted to measured serum concentrations for single oral exposure of male rats to 3 mg/kg PFNA with a lower elimination rate.** Note: in this simulation, the elimination rate was lowered to obtain a more realistic description of the elimination phase. The solid line is the modelled concentration, the circles indicate the mean measured serum concentration over time. Visually, the fit slightly overestimated the serum concentration measurements reported in Tatum-Gibbs *et al.* The parameter values used for the simulation were  $k_{10}$  (0.00025/h),  $k_{01}$  (1/h),  $bw$  (0.5 kg),  $V1$  (0.139 L/kg).

**Figure S4. Simulation of a single dose experiment for PFNA with a one-compartment model fitted to measured serum concentrations for single oral exposure of male rats to 3 mg/kg PFNA with an increased volume of distribution.** Note: in this simulation, the volume of distribution was increased. The solid line is the modelled concentration, the circles indicate the mean measured serum concentration over time. Visually, the simulation described the serum concentration measurements reported in Tatum-Gibbs *et al.* The parameter values used for the simulation were  $k_{10}$  (0.00025/h),  $k_{01}$  (1/h),  $bw$  (0.5 kg),  $V1$  (0.170 L/kg).

**Figure S5. Simulation of a single dose experiment for PFDA with a one-compartment model fitted to measured serum concentrations for single oral exposure of male rats to 50 mg/kg PFDA.** Note: modelling was based on the parameter values in Kawabata *et al.*, the volume of distribution of 0.663 L/kg calculated in this study, and plotted together with the serum measurements reported. The solid curve indicates the model estimate. Circles indicate the mean measured serum concentration data from Kawabata *et al.* Plus sign at  $t = 240$  hr indicates the measured serum concentration reported in Kawabata *et al.* The two values on the right side of the plot indicate the measured and modelled serum concentrations at the end of the experiment. The fit overestimated the serum concentration measurement with a factor 3.8.

**Figure S6. Simulation of a single dose experiment for PFOA with a one-compartment model according to the experimental conditions reported in Kawabata *et al.*, using the one-compartment model for PFOA parametrized based on Dzierlenga *et al.*** Note: the solid curve indicates the model estimate. Circle (at  $t = 240$  hr) indicates the measured serum concentration reported in Kawabata *et al.* The two values on the right side of the plot indicate the measured and modelled serum concentrations at the end of the experiment. Fitting the model of PFOA showed that the model overestimates the measurements of Kawabata *et al.*

**Figure S7. Simulation of a single dose experiment for PFDA with a one-compartment model according to the experimental conditions reported in Kawabata *et al.* using the one-compartment model for PFDA based on parameters from Dzierlenga *et al.*** Note: the solid and dashed curves indicate the model estimates of the serum concentrations in the central and peripheral compartments respectively. Circle (at  $t = 240$  hr) indicates the measured serum concentration reported in Kawabata *et al.* The two values on the right side of the plot indicate the measured and modelled (central compartment) serum concentrations at the end of the experiment. Fitting the model of PFDA showed that the model overestimates the measurements of Kawabata *et al.*

**Figure S8. Simulation of a single dose experiment for HFPO-DA with a two-compartment model fitted to measured plasma concentrations for single oral exposure of male rats to 10 mg/kg HFPO-DA to find the optimum elimination rate.** Note: Gannon *et al.* provide a value for absorption rate ( $k_{01}$ ), alpha rate, beta rate and the volume of distribution ( $V_1$ ), but not for the elimination rate ( $k_{10}$ ). Therefore,  $k_{10}$  was obtained by optimizing the ratio between the model and the plasma concentration measurements. Solid and dashed lines are the modelled concentrations in the first and second compartments respectively. Optimizing a two-compartment model to the measurements results in a value for  $k_{10}$  of 0.24/hr.

**Figure S9. Simulation of a single dose experiment for PFBA based on the parameter values in Table 1 and an average assumed body weight of 0.400 kg.** Note: PFBA serum concentration plotted against time (hr) after a single dose of 30 mg/kg. In the right panel serum concentrations are plotted on the  $\log_{10}$  scale. The solid line is the modelled concentration. Circles are the mean measured concentrations from Chang *et al.*

**Figure S10. Simulation of a single dose experiment for PFHxA based on the parameter values in Table 1 and an average reported body weight of 0.223 kg in Dzierlenga *et al.*** Note: PFHxA serum concentration plotted against time (hr) after a single dose of 160 mg/kg. In the right panel serum concentrations are plotted on the  $\log_{10}$  scale. The solid line is the modelled concentration. The dashed line indicates the concentration in the peripheral compartment. Circles are the individual measured concentrations from Dzierlenga *et al.* Note: three serum concentrations at  $t = 96$  hr are below LOQ, and not plotted on log y-axis.

**Figure S11. Simulation of a single dose experiment for PFOA based on the parameter values in Table 1 and an average reported body weight of 0.218 kg in Dzierlenga *et al.*** PFOA serum concentration plotted against time (hr) after a single dose of 12 mg/kg. In the right panel serum concentrations are plotted on the  $\log_{10}$  scale. The solid line is the modelled concentration. Circles are the individual measured concentrations from Dzierlenga *et al.*

**Figure S12. Simulation of a single dose experiment for PFNA based on the parameter values in Table 1 and an average assumed body weight of 0.500 kg in Tatum-Gibbs *et al.*** PFNA serum concentration plotted against time (hr) after a single dose of 3 mg/kg. In the right panel serum concentrations are plotted on the  $\log_{10}$  scale. The solid line is the modelled concentration. Circles are the mean measured concentrations from Tatum-Gibbs *et al.*

**Figure S13. Simulation of a single dose experiment for PFDA based on the parameter values in Table 1 and an average reported body weight of 0.255 kg in Dzierlenga *et al.*** PFDA serum concentration plotted against time (hr) after a single dose of 10 mg/kg. In the right panel serum concentrations are plotted on the  $\log_{10}$  scale. The solid line is the modelled concentration. The dashed line indicates the concentration in the peripheral compartment. Circles are the individual measured concentrations from Dzierlenga *et al.*

**Figure S14. Simulation of a single dose experiment for PFDoDA based on the parameter values in Table 1 and an average assumed body weight of 0.400 kg.** PFDoDA serum concentration plotted against time (hr) after a single dose of 50 mg/kg. In the right panel serum concentrations are plotted on the  $\log_{10}$  scale. The solid line is the modelled concentration. Circles are the mean measured concentrations from Kawabata *et al.*

**Figure S15. Simulation of a single dose experiment for PFBS based on the parameter values in Table 1 and an average reported body weight of 0.248 kg in Huang *et al.*** PFBS serum concentration plotted against time (hr) after a single dose of 20 mg/kg. In the right panel serum concentrations are plotted on the  $\log_{10}$  scale. The solid line is the modelled concentration. The dashed line indicates the concentration in the peripheral compartment. Circles are the individual measured concentrations from Huang *et al.*

**Figure S16. Simulation of a single dose experiment for PFHxS based on the parameter values in Table 1 and an average reported body weight of 0.247 kg in Huang *et al.*** PFHxS serum concentration plotted against time (hr) after a single dose of 16 mg/kg. In the right panel serum concentrations are plotted on the  $\log_{10}$  scale. The solid line is the modelled concentration. Circles are the individual measured concentrations from Huang *et al.*

**Figure S17. Simulation of a single dose experiment for PFOS based on the parameter values in Table 1 and an average reported body weight of 0.240 kg in Huang *et al.*** PFOS serum concentration plotted against time (hr) after a single dose of 2 mg/kg. In the right panel serum concentrations are plotted on the  $\log_{10}$  scale. The solid line is the modelled concentration. The dashed line indicates the concentration in the peripheral compartment. Circles are the individual measured concentrations from Huang *et al.*

**Figure S18. Simulation of single dose experiment for HFPO-DA based on the parameter values in Table 1 and an average assumed body weight of 0.400 kg.** HFPO-DA serum concentration plotted against time (hr) after a single dose of 10 mg/kg. In the right panel serum concentrations are plotted on the  $\log_{10}$  scale. The solid line is the modelled concentration. The dashed line indicates the concentration in the peripheral compartment. Circles are the individual measured concentrations from Gannon.

**Figure S19. Simulation of a 28-day repeated dose experiment for PFHxA.** Note: for each PFAS their one- and two-compartment models were implemented using the parameter values listed in Table 1 and the exposure conditions as reported in NTP.  $\log_{10}$  PFHxA serum concentration plotted against time (hr) after repeated doses of lower solid line and circles = 62.6 mg/kg bw/day; lower dashed line and triangles = 125 mg/kg bw/day; dotted line and plusses = 250 mg/kg bw/day; upper solid line and crosses = 500 mg/kg bw/day; upper dashed line and diamonds = 1000 mg/kg bw/day. The lines are the modeled concentrations using the parameter values listed in Table 1 and the exposure conditions as reported in NTP. Symbols are the measured concentrations from NTP. To distinguish measured points they have been shifted slightly.

**Figure S20. Simulation of a 28-day repeated dose experiment for PFHxA for the last ~48 hours of the experiment.** Note: for each PFAS their one- and two-compartment models were implemented using the parameter values listed in Table 1 and the exposure conditions as reported in NTP.  $\log_{10}$  PFHxA serum concentration plotted against time (hr) after repeated doses of lower solid line and circles = 62.6 mg/kg bw/day; lower dashed line and triangles = 125 mg/kg bw/day; dotted line and plusses = 250 mg/kg bw/day; upper solid line and crosses = 500 mg/kg bw/day; upper dashed line and diamonds = 1000 mg/kg bw/day. The lines are the modeled concentration using the parameter values listed in Table 1 and the exposure conditions as reported in NTP. Symbols are the measured concentrations from NTP. To distinguish measured points they have been shifted slightly.

**Figure S21. Simulation of a 28-day repeated dose experiment for PFOA.** Note: for each PFAS their one- and two-compartment models were implemented using the parameter values listed in Table 1 and the exposure conditions as reported in NTP. Log<sub>10</sub> PFOA serum concentration plotted against time (hr) after repeated doses of lower solid line and circles = 0.625 mg/kg bw/day; lower dashed line and triangles = 1.25 mg/kg bw/day; dotted line and plusses = 2.5 mg/kg bw/day; upper solid line and crosses = 5 mg/kg bw/day; upper dashed line and diamonds = 10 mg/kg bw/day. The lines are the modeled concentration using the parameter values listed in Table 1 and the exposure conditions as reported in NTP. Symbols are the measured concentrations from NTP. To distinguish measured points they have been shifted slightly.

**Figure S22. Simulation of a 28-day repeated dose experiment for PFNA.** Note: for each PFAS their one- and two-compartment models were implemented using the parameter values listed in Table 1 and the exposure conditions as reported in NTP. Log<sub>10</sub> PFNA serum concentration plotted against time (hr) after repeated doses of lower solid line and circles = 0.625 mg/kg bw/day; dashed line and triangles = 1.25 mg/kg bw/day; dotted line and plusses = 2.5 mg/kg bw/day; upper solid line and crosses = 5 mg/kg bw/day. The lines are the modeled concentration using the parameter values listed in Table 1 and the exposure conditions as reported in NTP. Symbols are the measured concentrations from NTP. To distinguish measured points they have been shifted slightly. Only two animals in highest dose group survived. No animals survived in the 10 mg/kg bw/day dose group, therefore no curve and points are given.

**Figure S23. Simulation of a 28-day repeated dose experiment for PFDA.** Note: for each PFAS their one- and two-compartment models were implemented using the parameter values listed in Table 1 and the exposure conditions as reported in NTP. Log<sub>10</sub> PFDA serum concentration plotted against time (hr) after repeated doses of lower solid line and circles = 0.156 mg/kg bw/day; lower dashed line and triangles = 0.312 mg/kg bw/day; dotted line and plusses = 0.625 mg/kg bw/day; upper solid line and crosses = 1.25 mg/kg bw/day; upper dashed line and diamonds = 2.5 mg/kg bw/day. The lines are the modeled concentration using the parameter values listed in Table 1 and the exposure conditions as reported in NTP. Symbols are the measured concentrations from NTP. To distinguish measured points they have been shifted slightly.

**Figure S24. Simulation of a 28-day repeated dose experiment for PFBS.** Note: for each PFAS their one- and two-compartment models were implemented using the parameter values listed in Table 1 and the exposure conditions as reported in NTP. Log<sub>10</sub> PFBS serum concentration plotted against time (hr) after repeated doses of lower solid line and circles = 62.6 mg/kg bw/day; dashed line and triangles = 125 mg/kg bw/day; dotted line and plusses = 250 mg/kg bw/day; upper solid line and crosses = 500 mg/kg bw/day. The lines are the modeled concentration using the parameter values listed in Table 1 and the exposure conditions as reported in NTP. Symbols are the measured concentrations from NTP. To distinguish measured points they have been shifted slightly.

**Figure S25. Simulation of a 28-day repeated dose experiment for PFBS for the last ~48 hours of the experiment.** Note: for each PFAS their one- and two-compartment models were implemented using the parameter values listed in Table 1 and the exposure conditions as reported in NTP. Log<sub>10</sub> PFBS serum concentration plotted against time (hr) after repeated doses of lower solid line and circles = 62.6 mg/kg bw/day; dashed line and triangles = 125 mg/kg bw/day; dotted line and plusses = 250 mg/kg bw/day; upper solid line and crosses = 500 mg/kg bw/day. The lines are the modeled concentration using the parameter values listed in Table 1 and the exposure conditions as reported in NTP. Symbols are the measured concentrations from NTP. To distinguish measured points they have been shifted slightly.

**Figure S26. Simulation of a 28-day repeated dose experiment for PFHxS.** Note: for each PFAS their one- and two-compartment models were implemented using the parameter values listed in Table 1 and the exposure conditions as reported in NTP. Log<sub>10</sub> PFHxS serum concentration plotted against time (hr) after repeated doses of lower solid line and circles = 0.625 mg/kg bw/day; lower dashed line and triangles = 1.25 mg/kg bw/day; dotted line and plusses = 2.5 mg/kg bw/day; upper solid line and crosses = 5 mg/kg bw/day; upper dashed line and diamonds = 10 mg/kg bw/day. The lines are the modeled concentration using the parameter values listed in Table 1 and the exposure conditions as reported in NTP. Symbols are the measured concentrations from NTP. To distinguish measured points they have been shifted slightly.

**Figure S27. Simulation of a 28-day repeated dose experiment for PFOS.** Note: for each PFAS their one- and two-compartment models were implemented using the parameter values listed in Table 1 and the exposure conditions as reported in NTP. Log<sub>10</sub> PFOS serum concentration plotted against time (hr) after repeated doses of lower solid line and circles = 0.312 mg/kg bw/day; lower dashed line and triangles = 0.625 mg/kg bw/day; dotted line and plusses = 1.25 mg/kg bw/day; upper solid line and crosses = 2.5 mg/kg bw/day; upper dashed line and diamonds = 5 mg/kg bw/day. The lines are the modeled concentration using the parameter values listed in Table 1 and the exposure conditions as reported in NTP. Symbols are the measured concentrations from NTP.

**Figure S28. National Health and Nutrition Examination Survey (NHANES) perfluoroalkyl substance (PFAS) measurements in blood plasma presented as PFOA equivalents.** Note: density plot of the sum PEQ concentration in serum (ng/mL) of all sexes and ages from the NHANES study population ( $n = 1929$ ). The black line represents the sum PEQ of all PFAS included (perfluorohexanoic acid (PFHxA), perfluorooctanoic acid (PFOA), perfluorononanoic acid (PFNA), perfluorohexane sulfonic acid (PFHxS), perfluorooctane sulfonic acid (PFOS), hexafluoropropylene oxide-dimer acid (HFPO-DA)) of which internal RPFs were derived.

**Figure S29. Mean contribution of each PFAS to the individual's total PFOA equivalents (PEQs) concentration.** Note: contribution (%) of each perfluoroalkyl substance (PFAS) (perfluorohexanoic acid (PFHxA), perfluorooctanoic acid (PFOA) as linear and branched forms combined, perfluorononanoic acid (PFNA), perfluorohexane sulfonic acid (PFHxS), perfluorooctane sulfonic acid (PFOS) as linear and branched forms combined, and hexafluoropropylene oxide-dimer acid (HFPO-DA)) to the sum of PEQs based on the PFAS serum concentration data from the National Health and Nutrition Examination Survey (NHANES) 2017-2018 cycle ( $n = 1929$ ).

## References
